# Supplementary material
Source: publisher figshare collection journal article supplement (https://diabetesjournals.figshare.com/ndownloader/files/35959262)
Supplement: Supplementary file 1 [file 35959262]

## Supplemental Material

**Supplementary Table 1. DRB1\*04:01 subjects with established type 1 diabetes for T cell assays.**

| <b>Patient</b> | <b>Gender</b> | <b>Age<br/>at draw (yrs)</b> | <b>Disease<br/>duration (yrs)</b> |
|----------------|---------------|------------------------------|-----------------------------------|
| #1             | female        | 43                           | 6                                 |
| #2             | male          | 21                           | 6                                 |
| #3             | female        | 34                           | 7                                 |
| #4             | female        | 20                           | 8                                 |
| #5             | male          | 20                           | 5                                 |
| #6             | female        | 18                           | 4                                 |
| #7             | male          | 18                           | 7                                 |
| #8             | female        | 18                           | 6                                 |
| #9             | male          | 19                           | 6                                 |
| #10            | female        | 26                           | 7                                 |
| #11            | female        | 51                           | 38                                |

mean (n=11) 26.18 9.09

SD (n=11) 11.47 9.64

**Supplementary Table 2. Autoantibodies against P4Hb are present prior to the presence of anti-insulin and hyperglycemia in NOD mice.**

| <b>NOD mice</b> | <b>age</b><br>(weeks old, wks) | <b>blood glucose <sup>^</sup></b><br>(blood glucose, mg/dL) | <b>anti-P4Hb *</b> | <b>anti-insulin *</b> |
|-----------------|--------------------------------|-------------------------------------------------------------|--------------------|-----------------------|
| #1              | 4                              | – ( 123)                                                    | +                  | –                     |
| #2              | 4                              | – ( 138)                                                    | +                  | –                     |
| #3              | 4                              | – ( 180)                                                    | +                  | –                     |
| #4              | 4                              | – ( 204)                                                    | +                  | –                     |
| #5              | 4                              | – ( 88 )                                                    | –                  | –                     |
| #6              | 4                              | – ( 194)                                                    | –                  | –                     |
| #7              | 8                              | – ( 104)                                                    | +                  | +                     |
| #8              | 8                              | – ( 96 )                                                    | +                  | +                     |
| #9              | 8                              | – ( 93 )                                                    | +                  | –                     |
| #10             | 8                              | – ( 159)                                                    | +                  | –                     |
| #11             | 8                              | – ( 116)                                                    | +                  | –                     |
| #12             | 8                              | – ( 99)                                                     | +                  | +                     |
| #13             | 11                             | – ( 60 )                                                    | +                  | +                     |
| #14             | 11                             | – ( 178)                                                    | +                  | +                     |
| #15             | 28                             | – ( 113)                                                    | +                  | –                     |
| #16             | 28                             | – ( 167)                                                    | +                  | +                     |
| #17             | 20                             | + (>500)                                                    | +                  | +                     |
| #18             | 22                             | + ( 466)                                                    | +                  | +                     |
| #19             | 22                             | + (>500)                                                    | +                  | +                     |
| #20             | 24                             | + ( 363)                                                    | +                  | +                     |
| #21             | 26                             | + (>500)                                                    | –                  | +                     |
| #22             | 28                             | + (>500)                                                    | +                  | +                     |

<sup>^</sup>, diabetics defined as positive if blood glucose concentration > 250 mg/dL

\*, defined as positive if ELISA OD > (average OD + 2SD) of control mice (n=5)

**Supplementary Table 3.**  
**The carbonyl residues identified in human P4Hb under oxidative stress.**

| Domain in                                            | Position | Sequence                                 | Modifications              | PEP      | PEP      | [Log  | Score | Delta | Delta Modification | Observation | ppm       | Observation | Calculation |           |    |
|------------------------------------------------------|----------|------------------------------------------|----------------------------|----------|----------|-------|-------|-------|--------------------|-------------|-----------|-------------|-------------|-----------|----|
| P4Hb                                                 |          |                                          | (variable)                 | 2D       | 1D       | Prob] |       | Score | Score              | z           |           | m/z         | err.        | MH        | MH |
| DNPH derivitization before trypsin treatment         |          |                                          |                            |          |          |       |       |       |                    |             |           |             |             |           |    |
| a                                                    | Thr 101  | K.VDATEESDLAQYGVGRYPT[+178.01000]IKFFR.N | T20(Thr-DNPH / 178.01)     | 0.0075   | 0.0097   | 2.12  | 351.4 | 351.4 | 26.1               | 3           | 1023.4897 | 2.52        | 3068.4547   | 3068.447  |    |
| b'                                                   | Lys 276  | K.SVSDYDGKLSNFK[+179.02000]TAAESFK.G     | K13(Lys-DNPH / 179.02)     | 0.0051   | 0.0065   | 2.29  | 339   | 339   | 27.9               | 3           | 792.0274  | -1.09       | 2374.0676   | 2374.0702 |    |
| b'                                                   | Lys 326  | R.LITLEEEMTK[+179.02000]YKPESEELTAER.I   | K10(Lys-DNPH / 179.02)     | 0.0036   | 0.0046   | 2.44  | 329.6 | 329.6 | 153.3              | 3           | 945.4476  | 0.51        | 2834.3283   | 2834.3269 |    |
| 2nd time DNPH derivitization after trypsin treatment |          |                                          |                            |          |          |       |       |       |                    |             |           |             |             |           |    |
| a                                                    | Lys 31** | R.K[+181.037]SNFAEALAAHK.Y               | K1(Lys-DNPHred / 181.037)* | 1.30E-06 | 2.20E-06 | 5.87  | 477.7 | 477.7 | 477.7              | 3           | 490.244   | 7.97        | 1468.7175   | 1468.7058 |    |
| a                                                    | Pro 61   | K.ALAP[+196.023]EYAK.A                   | P4(Lys-DNPHred / 196.023)* | 1.80E-05 | 2.80E-05 | 4.75  | 355.6 | 326.5 | 326.5              | 2           | 529.749   | 0.04        | 1058.490    | 1058.490  |    |
| b'                                                   | Pro 246  | K.HNQLPLVIEFTEQTAP[+196.126]K.I          | P16(Pro-DNPHred / 196.12)* | 1.50E-08 | 2.40E-08 | 7.82  | 444.3 | 444.3 | 376                | 3           | 781.4     | 0.29        | 2342.207    | 2342.206  |    |
| b'                                                   | Lys 326  | R.LITLEEEMTK[+179.021]YKPESEELTAER.I     | K10(Lys-DNPH / 179.02)     | 8.10E-07 | 1.30E-06 | 6.09  | 383.2 | 383.2 | 187.8              | 3           | 945.4476  | 0.09        | 2834.333    | 2834.328  |    |

\*DNPHred: DNPH + stabilizer

\*\* K31 was also identified in control rhP4Hb protein.

**A**

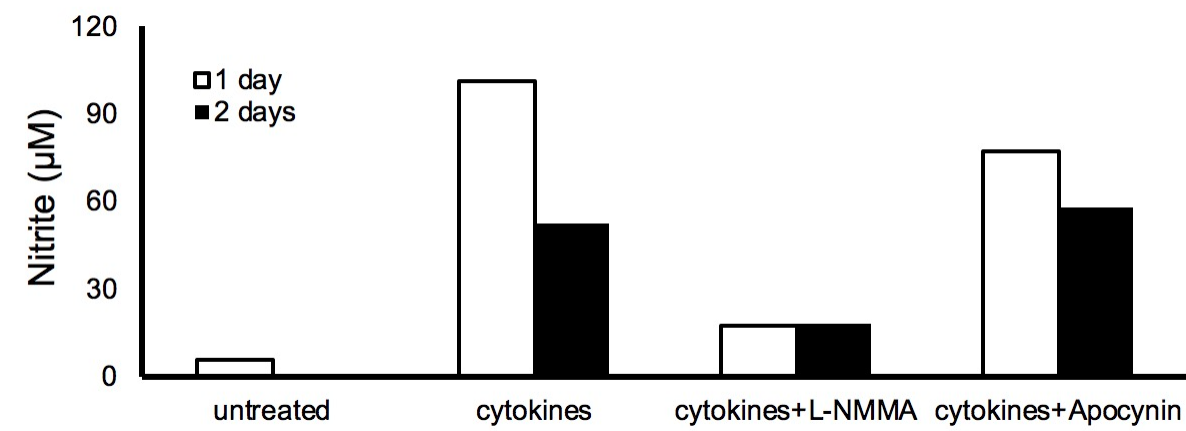

**B**

|                               |   |   |   |   |   |   |   |
|-------------------------------|---|---|---|---|---|---|---|
| H <sub>2</sub> O <sub>2</sub> | - | + | + | + | - | - | - |
| cytokines                     | - | - | - | - | + | + | + |
| L-NMMA                        | - | - | + | - | - | + | - |
| apocynin                      | - | - | - | + | - | - | + |

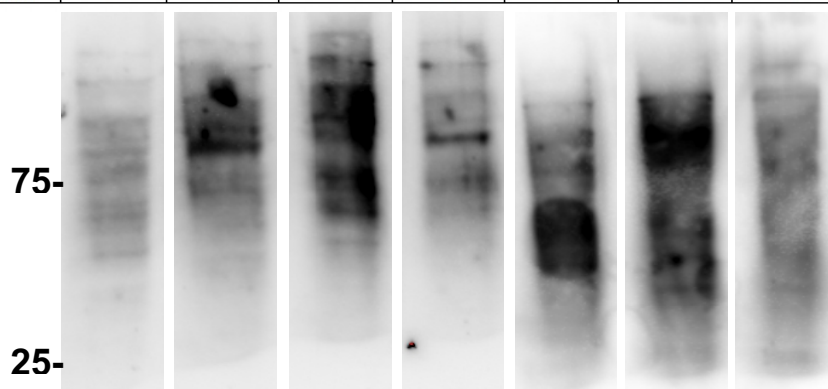

**Supplementary Figure 1: The carbonylation triggered by H<sub>2</sub>O<sub>2</sub> and cytokines in beta cells is mediated via reactive oxygen species (ROS) not nitrite.** *A*: INS-1 cells were treated with cytokines (IFN $\gamma$ +IL-1 $\beta$ ) in the presence of L-NMMA (2mM) or apocynin (50 $\mu$ M). After one day or two days treatment, supernatant was collected and measured the nitrite level by using Griess reagent. *B*: The carbonylation level was measured by OxyBlot in untreated, 300  $\mu$ M H<sub>2</sub>O<sub>2</sub> (one hour) and cytokines treated (one day) INS-1 cells. Ten  $\mu$ g cell lysate protein were loading per lane. Molecular mass, in kDa, is indicated on the left.

A

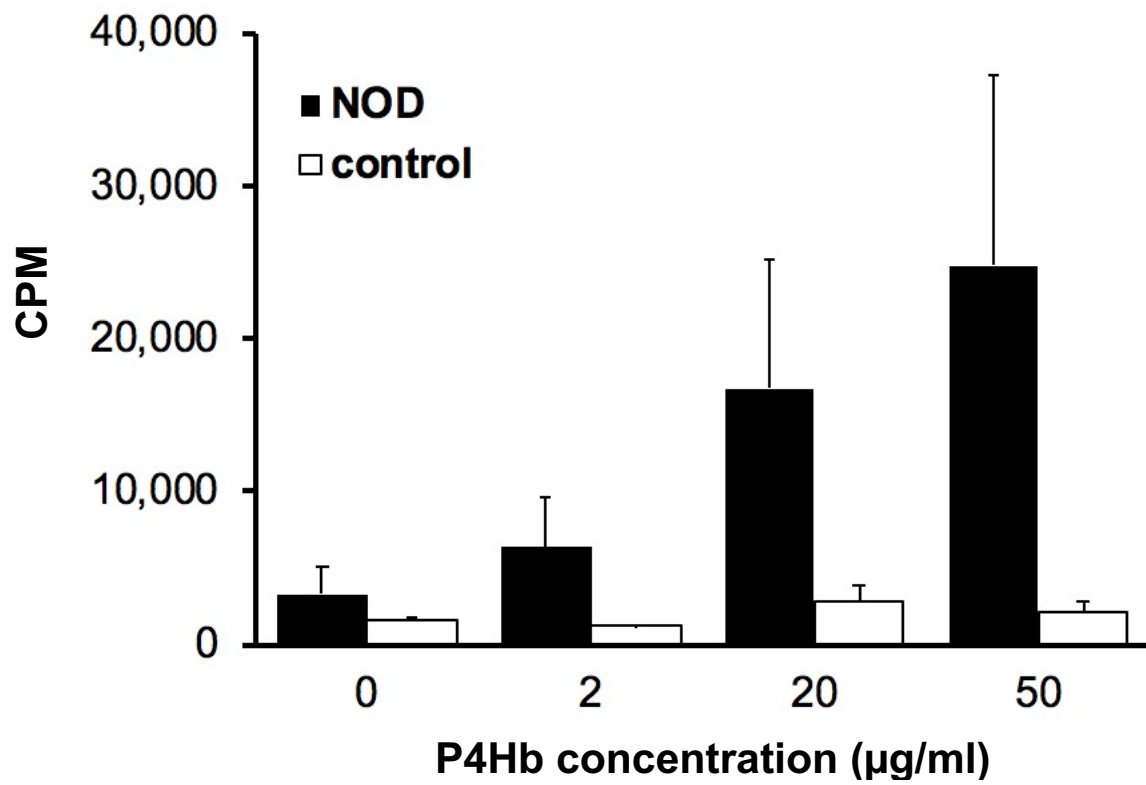

B

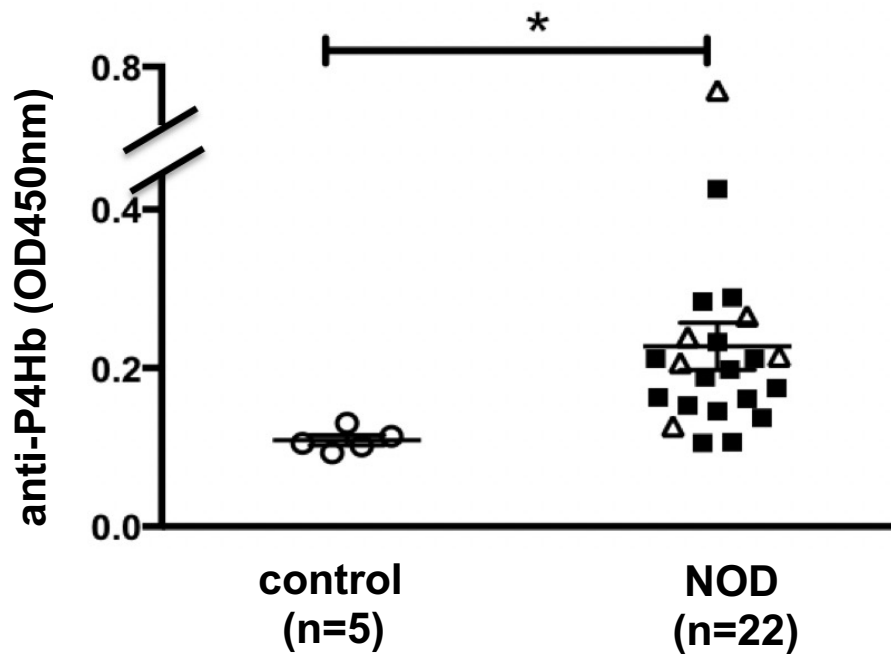

**Supplementary Figure 2: The circulating autoreactive lymphocytes and IgG autoantibodies against P4Hb protein in NOD mice.** *A:* Fresh pooled axillary, inguinal, brachial, popliteal and pancreatic lymph node cells ( $5 \times 10^5$ ) from 4- to 5-wk-old prediabetic NOD mice or control mice (C57Bl/6 strain) were plated with pre-coated anti-CD3 (10 $\mu$ g/ml) mAb as positive control or incubated with varying concentrations of recombinant human P4Hb (rhP4Hb) for 48 h. Then proliferation was measured by [ $^3$ H]thymidine incorporation. *B:* The serum levels of anti-rhP4Hb in NOD and control mice (BALB/c strain) were measured by ELISA. The number of mice analyzed is indicated at the bottom of each group. \*Student t test,  $p < 0.001$ . The filled squares show data where the blood glucose content was less than 250 mg/dL; the open triangles data where the blood glucose was greater than 250 mg/dL. Error bars indicate SEM of mean.

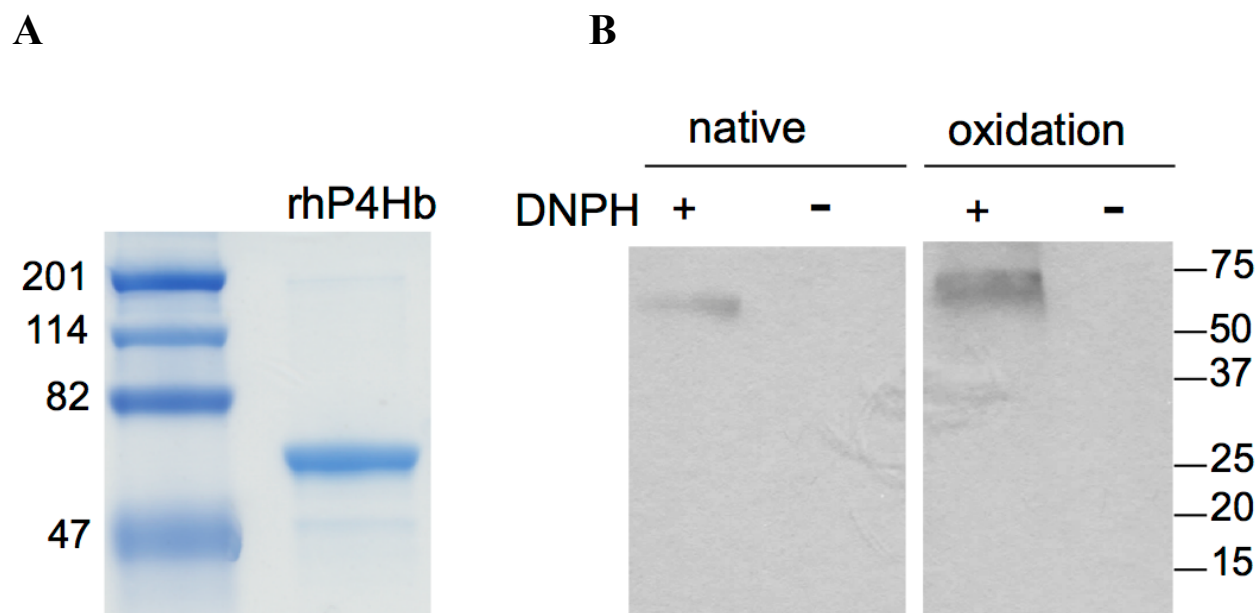

**Supplementary Figure 3: The characterization of purified recombinant human P4Hb from hPDI-pTrcHisA clone.** (A) Briefly, the hPDI-pTrcHisA plasmid was transformed into BL21(DE3) cells for expression with 0.5 mM IPTG induction. P4Hb was purified from cell lysates using Pro Bond Ni-NTA resin and imidazole elution. Proteins were concentrated with Centriprep YM-30 and judged to be ~95% pure by SDS-PAGE stained with Coomassie Brilliant Blue. Polypeptide molecular weight marker proteins in kDa are shown in the left lane. (B) The purified rhP4Hb was incubated in PBS (native) or PBS containing 100  $\mu$ M FeSO<sub>4</sub>, 25mM H<sub>2</sub>O<sub>2</sub> and 25mM ascorbate (oxidation) at 37°C for 4 h in the presence or absence of dinitrophenylhydrazine. Then the carbonyl modification was analyzed by OxyBlot. The positions of polypeptide molecular weight markers in kDa are on the right edge of the gel.
